# Supplementary material for: Novel Findings of Anti-Filarial Drug Target and Structure-Based Virtual Screening for Drug Discovery
Source: MDPI journal article supplement (doi:10.3390/ijms19113579), 2018-11-13
Supplement: s1 [file s1]

## Supplementary Figure S1 and Table S1:

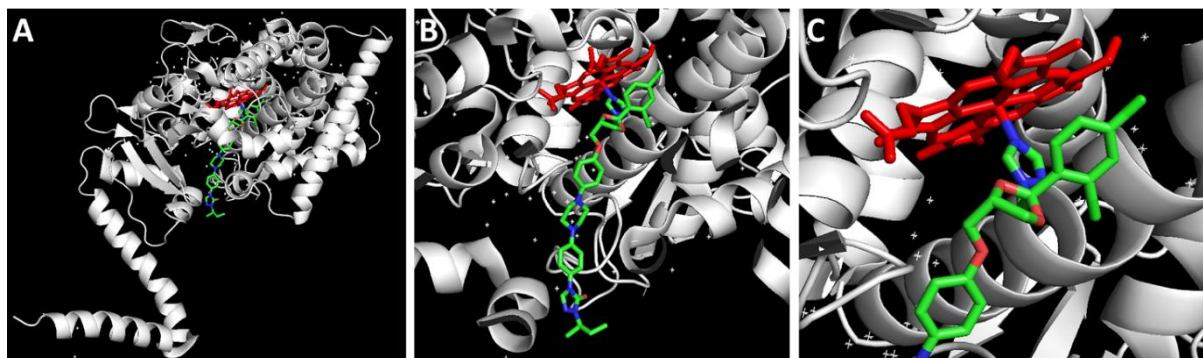

**Figure S1.** Docking mode of ITC to *Saccharomyces cerevisiae* lanosterol 14- $\alpha$ -demethylase (PDB accession no. 5EQB). Overview of binding (A) and detailed magnified images (B–C). *S. cerevisiae* lanosterol 14- $\alpha$ -demethylase is shown as gray. Active site heme is shown as red sticks. ITC carbon atoms are colored green, oxygen red and nitrogen blue.

**Table S1.** The top 10 threading templates used to build an individual model.

| Rank * | Organism |          |          |          |
|--------|----------|----------|----------|----------|
|        | BmCALU-1 | CeCALU-1 | OvCALU-1 | HsCALU-1 |
| 1      | 2f33A    | 2f33A    | 2f33A    | 4p5wA    |
| 2      | 2be4A    | 4p5wA    | 4p5wA    | 4p5wA    |
| 3      | 1ij5A    | 2be4A    | 2be4A    | 1ij5A    |
| 4      | 2be4A    | 1ij5A    | 2be4A    | 3q5iA    |
| 5      | 2q4uA    | 2be4A    | 2f33A    | 4il1A    |
| 6      | 1ij5A    | 1ij5A    | 1ij5A    | 1ij5A    |
| 7      | 4aqrA    | 1ij5A    | 2f33A    | 1ij5A    |
| 8      | 2q4uA    | 4aqrA    | 4aqrA    | 4aqrA    |
| 9      | 2f33A    | 2q4uA    | 2f33A    | 1ij5A    |
| 10     | 2be4A    | 2f33A    | 2f33A    | 1ij5A    |

\* The top 10 alignments (in order of their ranking) are from the following threading programs: 1, MUSTER; 2, FFAS-3D; 3, SPARKS-X; 4, HHSEARCH2; 5, HHSEARCH I; 6, Neff-PPAS; 7, HHSEARCH; 8, pGenTHREADER; 9, wdPPAS; 10, cdPPAS.
